# Supplementary material
Source: HighWire-hosted journal article supplement (doi:10.1101/rna.046367.114)
Supplement: FigS1Legend.docx [file FigS1Legend.docx]

**Fig. S1.** Sequence of PCR amplified intron DNA junctions. Head-to-tail (H/T) intron DNA junctions were PCR amplified from total nucleic acid extracts of *L. lactis* expressing the Ll.LtrB-WT construct previously treated with RNaseA and digested (*B*) or not (*A*) with BsiWI. The top and bottom sequences correspond respectively to the upstream and downstream parental regions that lead to the junction represented in the middle. Homologous nts are bolded. Some DNA junctions (|) were identified independently up to 23 times (X) and are perfect (0), missing some nts (-) or harboring extra nts (+). In some cases, the junction could not be precisely identified because of the presence of identical nts (2-8 nts) on both sides of the junction (bold and underlined). For panel *B*, the primer used on the 5’ side was 36 nts further upstream past the BsiWI recognition site.
